# Prolyl isomerase Pin1: a catalyst for oncogenesis and a potential therapeutic target in cancer

Akihide Ryo, Yih-Cherng Liou, Kun Ping Lu\* and Gerburg Wulf\*

Cancer Biology Program, Division of Hematology/Oncology, Department of Medicine, Beth Israel Deaconess Medical Center, Harvard Medical School, Boston, MA 02215, USA

\*Authors for correspondence (e-mail: klu@caregroup.harvard.edu; gwulf@caregroup.harvard.edu)

*Journal of Cell Science* 116, 773-783 © 2003 The Company of Biologists Ltd  
doi:10.1242/jcs.00276

## Summary

Phosphorylation of proteins on serine or threonine residues preceding proline (Ser/Thr-Pro) is a major intracellular signaling mechanism. The phosphorylated Ser/Thr-Pro motifs in a certain subset of phosphoproteins are isomerized specifically by the peptidyl-prolyl cis-trans isomerase Pin1. This post-phosphorylation isomerization can lead to conformational changes in the substrate proteins and modulate their functions. Pin1 interacts with a number of mitotic phosphoproteins, and plays a critical role in mitotic regulation. Recent work indicates that Pin1 is overexpressed in many human cancers and plays an important role in oncogenesis. Pin1 regulates the

expression of cyclin D1 by cooperating with Ras signaling and inhibiting the interaction of  $\beta$ -catenin with the tumor suppressor APC and also directly stabilizing cyclin D1 protein. Furthermore, *PIN1* is an E2F target gene essential for the Neu/Ras-induced transformation of mammary epithelial cells. Pin1 is also a critical regulator of the tumor suppressor p53 during DNA damage response. Given its role in cell growth control and oncogenesis, Pin1 could represent a new anti-cancer target.

Key words: Phosphorylation, Prolyl-isomerase, Pin1, Post-phosphorylation regulation, Signal transduction, Oncogenesis

## Introduction

The phosphorylation of proteins on serine or threonine residues that immediately precede proline residues (Ser/Thr-Pro) is an important signaling mechanism controlling many cellular processes, such as cell cycle regulation, transcription, cell differentiation and proliferation (Blume-Jensen and Hunter, 2001; Hunter, 1995; Hunter, 1998; Lu, K. P. et al., 2002b). The deregulation of this elaborate signaling mechanism can result in cell transformation and oncogenesis. Therefore, precise pre- and post-phosphorylation regulatory mechanisms have evolved that maintain steady-state intracellular signaling.

Ser/Thr-Pro motifs are the major phosphorylation sites for a large superfamily of 'proline-directed' kinases, including cyclin-dependent kinases (CDKs), mitogen-activated protein kinases (MAPKs) and glycogen synthase kinase 3 $\beta$  (GSK-3 $\beta$ ), and conversely they are dephosphorylated by Ser/Thr phosphatases, including PP2A, FCP1 and calcineurin (Lu, K. P. et al., 2002b). Furthermore, MAPK ERK2 and CDK2, as well as the Ser/Thr phosphatase PP2A, are conformation specific, preferentially phosphorylating/dephosphorylating the trans isomer (Brown et al., 1999; Weiwad et al., 2000; Zhou et al., 2000). Ser/Thr phosphorylation has for a long time been believed to regulate the function of proteins by altering their conformations; however, little is known about the actual conformational changes and their importance. The identification and characterization of a peptidyl-prolyl cis/trans isomerase (PPIase), Pin1, has led to the discovery of a novel post-phosphorylation regulatory mechanism (Lu et al., 1996; Ranganathan et al., 1997; Yaffe et al., 1997). Pin1 binds to and isomerizes the peptidyl-prolyl bond in specific phosphorylated

Ser/Thr-Pro motifs and thereby induces conformational changes in its target proteins (Albert et al., 1999; Arevalo-Rodriguez et al., 2000; Hsu et al., 2001; Kops et al., 2002; Liou et al., 2002; Lu et al., 1999a; Lu et al., 1999b; Ryo et al., 2002; Ryo et al., 2001; Shen et al., 1998; Stukenberg and Kirschner, 2001; Wu et al., 2000; Wulf et al., 2002; Wulf et al., 2001; Yaffe et al., 1997; Zacchi et al., 2002; Zheng et al., 2002; Zhou et al., 2000). These conformational changes can have profound effects on the function of Pin1 substrates, modulating their activity, phosphorylation status, protein-protein interactions, subcellular localization and stability (Fig. 1). For example, Pin1 can bind to and induce conformational changes in the mitotic phosphatase Cdc25C and the microtubule-binding protein tau, after they have been phosphorylated on specific Ser/Thr-Pro motifs. Such conformational changes can directly inhibit the ability of phosphorylated Cdc25C to dephosphorylate and activate Cdc2 (Shen et al., 1998; Stukenberg and Kirschner, 2001; Zhou et al., 2000), or restore the ability of phosphorylated tau to promote microtubule assembly (Lu et al., 1999a). Furthermore, such conformational changes can also regulate the dephosphorylation of Cdc25C and tau because phosphatases such as PP2A dephosphorylate only the trans isoform of phosphorylated Ser/Thr-Pro motifs (Zhou et al., 2000). Thus, phosphorylation-dependent prolyl isomerization is a new post-phosphorylation signaling mechanism.

Pin1 was originally identified in a yeast two-hybrid screen as a human protein that interacts physically and functionally with a mitotic kinase and was the first peptidyl-prolyl cis/trans isomerase (PPIase) shown to be essential for cell division in yeast and human cells (Lu et al., 1996). Pin1 homologues are

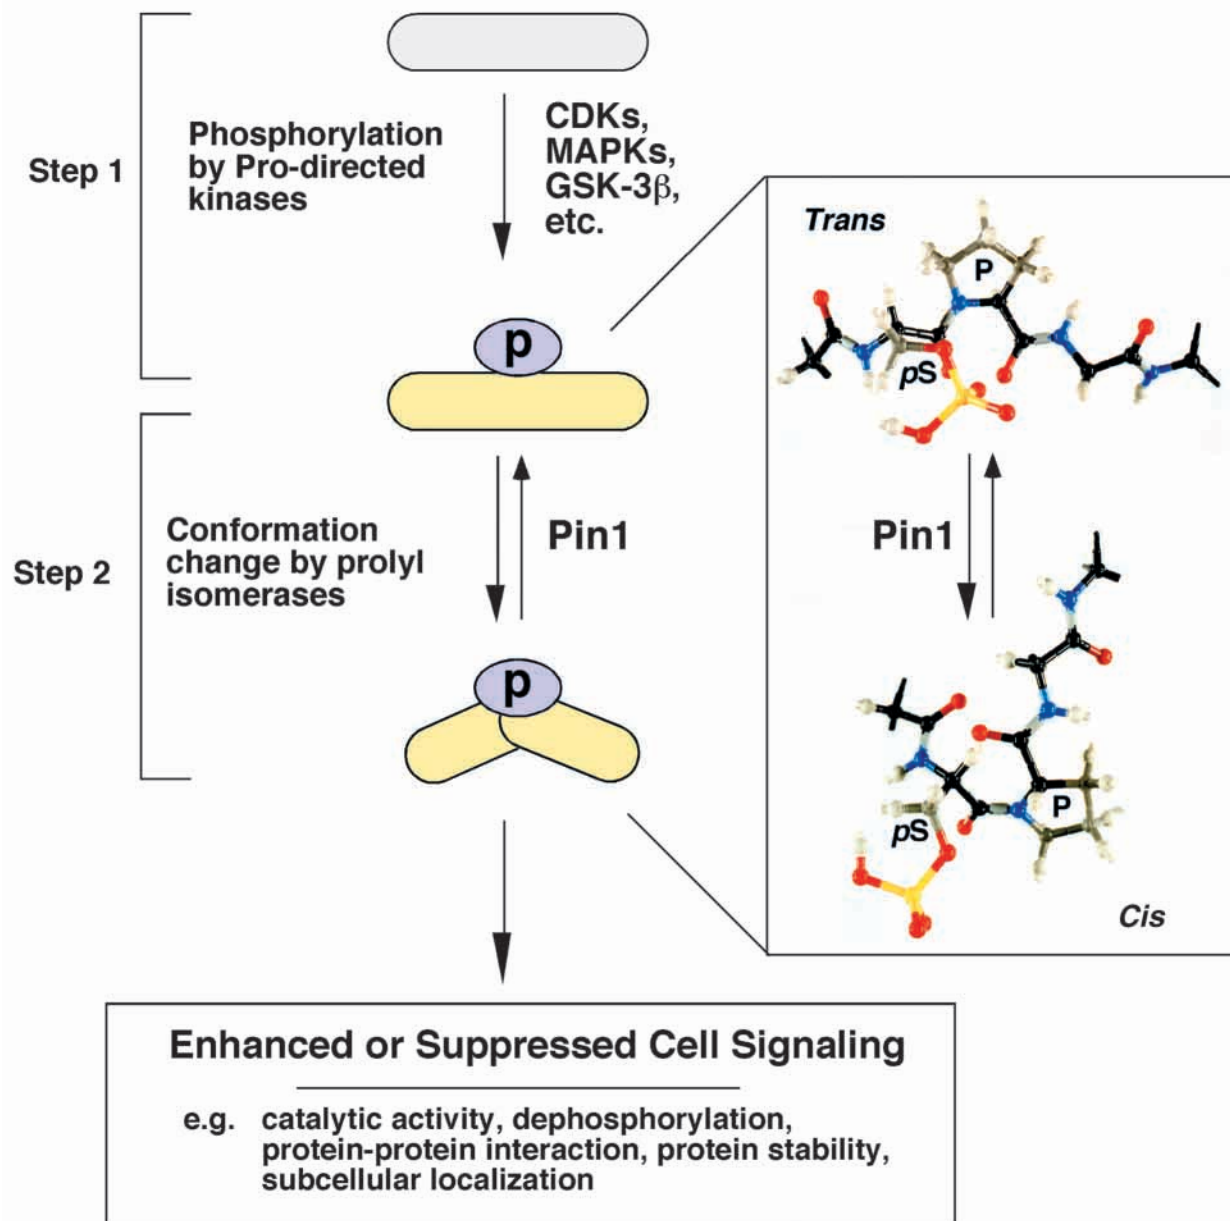

**Fig. 1.** A novel post-phosphorylation regulatory mechanism in phosphorylation signaling. Phosphorylation of proteins by proline-directed kinases (e.g. CDKs, MAPKs, GSK-3 $\beta$ ) creates binding sites for the prolyl-isomerase Pin1 (1st step). Subsequent prolyl-isomerization by Pin1 induces conformational changes and thereby regulates the function of target proteins (2nd step).

highly conserved in eukaryotes (Huang et al., 2001; Landrieu et al., 2000; Metzner et al., 2001; Yao et al., 2001; Zhou et al., 1999), and the budding yeast homologue, Ess1p/Ptrf1p, was isolated a long time ago but did not have any previously known activity (Hanes et al., 1989; Hani et al., 1995). With the exception of the plant enzymes, which appear to contain only PPIase domains, most other Pin1-type PPIases also contain an N-terminal WW domain. The function of the WW domain is to target the enzyme to its substrates, where the PPIase domain is both sufficient and necessary to catalyze the conformational change and to carry out the essential function of this enzyme. Depletion of Pin1 causes mitotic arrest and apoptosis in budding yeast and tumor cell lines (Lu et al., 1996), and Pin1 is required for the DNA replication checkpoint and G2/M

transition in *Xenopus* extracts (Winkler et al., 2000). Pin1 has been shown to be involved in the regulation of many other cellular events, such as cell cycle progression, transcriptional regulation and cell proliferation and differentiation (Albert et al., 1999; Arevalo-Rodriguez et al., 2000; Crenshaw et al., 1998; Gerez et al., 2000; Hani et al., 1999; Hsu et al., 2001; Kamimoto et al., 2001; Lavoie et al., 2001; Liou et al., 2002; Liu et al., 2001; Messenger et al., 2002; Morris et al., 1999; Pathan et al., 2001; Patra et al., 1999; Rippmann et al., 2000; Ryo et al., 2002; Ryo et al., 2001; Shen et al., 1998; Wu et al., 2000; Wulf et al., 2001). Furthermore, it is involved in the DNA damage response, regulating p53 function (Wulf et al., 2002; Zacchi et al., 2002; Zheng et al., 2002). Moreover, it is also involved in Alzheimer's disease (Lu et al., 1999a; Zhou et al.,

**Table 1. Representative known Pin1 substrates**

| Protein       | Function                                                      | References                                                                                                                        |
|---------------|---------------------------------------------------------------|-----------------------------------------------------------------------------------------------------------------------------------|
| NIMA          | Mitotic kinase                                                | Lu et al., 1996                                                                                                                   |
| Cdc25C        | Protein phosphatase for Cdc2                                  | Yaffe et al., 1997; Crenshaw et al., 1998; Shen et al., 1998; Lu et al., 1999b; Zhou et al., 2000; Stukenberg and Kirschner, 2001 |
| Plk 1         | Mitotic kinase                                                | Yaffe et al., 1997; Crenshaw et al., 1998; Shen et al., 1998                                                                      |
| Cdc27         | Anaphase-promoting complex component                          | Yaffe et al., 1997; Shen et al., 1998                                                                                             |
| Rab4          | GTP-binding protein                                           | Yaffe et al., 1997; Gerez et al., 2000                                                                                            |
| p70/S6 kinase | Protein kinase                                                | Yaffe et al., 1997                                                                                                                |
| Wee1          | Mitotic kinase                                                | Shen et al., 1998                                                                                                                 |
| Myt1          | Mitotic kinase                                                | Shen et al., 1998; Wells et al., 1999                                                                                             |
| CENP-F        | Kinetokore protein                                            | Shen et al., 1998                                                                                                                 |
| Incenp        | Inner centromere protein                                      | Shen et al., 1998                                                                                                                 |
| Tau           | Microtubule-interacting protein                               | Lu et al., 1999a; Zhou et al., 2000                                                                                               |
| Pol II        | RNA polymerase II                                             | Albert et al., 1999; Morris et al., 1999; Verdecia et al., 2000; Wu et al., 2000; Kops et al., 2002                               |
| Sin3-Rpd3     | Histone deacetylase                                           | Arevalo-Rodriguez et al., 2000                                                                                                    |
| NHERF-1       | Na <sup>+</sup> /H <sup>+</sup> exchanger regulatory factor 1 | He et al., 2001                                                                                                                   |
| KRMP1         | Kinesin-related protein                                       | Kamimoto et al., 2001                                                                                                             |
| hSpt5         | A DRB sensitivity-inducing factor component                   | Lavoie et al., 2001                                                                                                               |
| Bcl-2         | Anti-apoptotic factor                                         | Pathan et al., 2001; Basu et al., 2002                                                                                            |
| c-Jun         | Transcription factor                                          | Wulf et al., 2001                                                                                                                 |
| β-catenin     | Transcription activator                                       | Ryo et al., 2001                                                                                                                  |
| NFAT          | Transcription factor                                          | Liu et al., 2001                                                                                                                  |
| Cf-2          | Transcriptional repressor                                     | Hsu et al., 2001                                                                                                                  |
| Cyclin D1     | Cell cycle regulator                                          | Liou et al., 2002; Ryo et al., 2002                                                                                               |
| CK2           | Protein kinase                                                | Messenger et al., 2002                                                                                                            |
| p53           | Transcription factor                                          | Wulf et al., 2002; Zacchi et al., 2002; Zheng et al., 2002                                                                        |

2000) and cancer (Liou et al., 2002; Ryo et al., 2002; Ryo et al., 2001; Wulf et al., 2001).

Here we review recent studies demonstrating the role of Pin1 in cell growth control and oncogenesis and discuss the feasibility of Pin1 as a potential therapeutic target for anti-cancer treatment. Comprehensive recent reviews on function and regulation of Pin1 (Lu, K. P. et al., 2002b; Zhou et al., 1999), as well as its specific role in transcription (Shaw, 2002) and in Alzheimer's disease (Lu, K. P. et al., 2002a), are available elsewhere.

### Regulation of cyclin D1 expression

At least 20 proteins have been shown to be Pin1 targets (Table 1). Of these known Pin1 substrates, cyclin D1 is the most extensively studied both in vitro and in vivo (Liou et al., 2002; Ryo et al., 2002; Ryo et al., 2001; Wulf et al., 2001). The connection between Pin1 and cyclin D1 was originally identified in screens for Pin1 expression in human breast cancer tissues (Wulf et al., 2001). Indeed, Pin1 is overexpressed in several human cancers, including breast, lung and prostate cancers and its expression levels positively correlate with the tumor grade in breast cancer (Ryo et al., 2001; Wulf et al., 2001). In addition, Pin1 is overexpressed in all breast cancer cell lines examined when compared with non-transformed or primary mammary epithelial cells (Wulf et al., 2001), and Pin1 is one of the genes suppressed by overexpression of wild-type BRCA1 (MacLachlan et al., 2000).

Elevated Pin1 levels in breast cancer significantly correlate with cyclin D1 overexpression (Ryo et al., 2002; Ryo et al., 2001; Wulf et al., 2001). In fact, we have found that Pin1 levels in cyclin D1 overexpressing tumors are on average about twice as high as those in cyclin-D1-negative tumors. This is significant given that cyclin D1 is an essential downstream

target for mammary tumorigenesis. Cyclin D1 is overexpressed in about half of breast cancer patients (Bartkova et al., 1994; Gillett et al., 1994). Overexpression of cyclin D1 contributes to cell transformation (Alt et al., 2000; Hinds et al., 1994), inhibition of cyclin D1 expression by antisense expression causes growth arrest in tumor (Arber et al., 1997; Driscoll et al., 1997; Kornmann et al., 1998; Schrupp et al., 1996) and disruption of the cyclin D1 gene in mice completely suppresses the ability of Ha-Ras or Her2/Neu to induce tumor development in mammary glands (Yu et al., 2001). In breast cancer tissues, Her2/Neu overexpression correlates with Pin1 overexpression, although this correlation did not reach statistical significance, probably because of the small number of Her2/Neu-positive patients in the study (Wulf et al., 2001). It is of interest, though, that Pin1 levels were 1.7-2 times higher in patients who are either Her2/Neu positive, or negative for estrogen receptor expression (Wulf et al., 2001). Further studies in larger cohorts may clarify the relationship between Pin1 expression and these unfavorable biochemical markers, and establish whether Pin1 expression would be a useful additional marker for breast cancer prognosis.

### Cooperation with the Ras/AP-1 signaling pathway

The AP-1 complex, which includes transcription factors such as Jun, Fos and FosB, regulates a wide range of cellular processes, including cell proliferation, cell death, survival and differentiation, and has a binding site in the cyclin D1 promoter (Shaulian and Karin, 2002). The significance of Jun activation for cell proliferation and cyclin D1 induction has been studied in mice lacking AP-1 components. *Fos/FosB* double knockout and *Jun* knockout mouse embryonic fibroblasts (MEFs) have reduced cyclin D1 levels and display severe proliferative defects (Behrens et al., 1999; Brown et al., 1998; Shaulian and Karin, 2001; Shaulian and Karin, 2002). Ras signaling

activates the proline-directed MAP kinases p38 and JNK/SAPK, which phosphorylate Jun on two critical N-terminal Ser-Pro motifs at Ser63 and Ser73, thereby enhancing its transcriptional activity (Albanese et al., 1999; Albanese et al., 1995; Bakiri et al., 2000; Binetruy et al., 1991; Derijard et al., 1994; Shaulian and Karin, 2001; Whitmarsh and Davis, 1996). How the activity of Jun is further regulated after phosphorylation has not been known until recently.

We have found that Pin1 not only binds phosphorylated Jun but also increases its ability to activate the cyclin D1 promoter in cooperation either with activated JNK or oncogenic Ha-Ras. In contrast, inhibition of endogenous Pin1 reduces the transcriptional activity of phosphorylated Jun, indicating that endogenous Pin1 is also required for optimal activation. Thus, Pin1 is a potent modulator of phosphorylated Jun in inducing cyclin D1 expression, presumably by regulating the conformation of the phosphorylated Ser-Pro motifs in Jun (Wulf et al., 2001). Jun is basically a positive regulator of cell proliferation (Behrens et al., 1999; Brown et al., 1998; Shaulian and Karin, 2001; Shaulian and Karin, 2002), and the Pin1-induced conformational changes in Jun potentially affect its ability to form homo- or hetero-dimers and/or its DNA binding activity. However, further studies are necessary to define the molecular mechanisms by which Pin1 affects Jun function.

### Activation of the Wnt/ $\beta$ -catenin pathway

Wnt/ $\beta$ -catenin signaling is involved in control of gene expression, cell adhesion and cell polarity (Kinzler and Vogelstein, 1996; Moon et al., 2002; Morin, 1999; Polakis, 2000). Activation of the Wnt/ $\beta$ -catenin signaling pathway is a major feature of human cancers (Kinzler and Vogelstein, 1996; Polakis, 2000). Deregulation of this signaling pathway has been found in a subset of human malignancies that carry mutations in proteins participating in this pathway, such as APC (adenomatous polyposis coli), axin and  $\beta$ -catenin itself (Kinzler and Vogelstein, 1996; Polakis, 2000; Satoh et al., 2000). The end result of this aberrant activation is always the cytosolic stabilization of  $\beta$ -catenin, which enhances the transcription of a number of target genes, including the cyclin D1 gene and *Myc*, which can lead to oncogenesis (Behrens et al., 1996; He et al., 1998; Mann et al., 1999; Molenaar et al., 1996; Tetsu and McCormick, 1999). Mutations in APC or  $\beta$ -catenin are often found in certain tumor types, such as colon cancer (Kinzler and Vogelstein, 1996; Morin, 1999; Polakis, 2000), but they are rarely observed in others, such as breast cancer (Jonsson et al., 2000; Lin et al., 2000; Schlosshauer et al., 2000). However, there is compelling evidence for a crucial role for  $\beta$ -catenin signaling in the tumorigenesis of breast cancer (Jonsson et al., 2000; Lin et al., 2000; Roose et al., 1999; Schlosshauer et al., 2000). Furthermore,  $\beta$ -catenin levels are significantly upregulated and are a strong and independent prognostic factor in human breast cancer patients (Lin et al., 2000).

A differential display screen for genes regulated by Pin1 that compared inducible Pin1-overexpressing breast cancer MCF-7 cells and control cells identified 17 known genes (Ryo et al., 2001). Interestingly, four of the 12 genes whose expression is upregulated are targets of  $\beta$ -catenin and its transcriptional partner TCF: those encoding cyclin D1, *Myc*, PPAR- $\delta$  and

fibronectin (Gradl et al., 1999; He et al., 1999; He et al., 1998; Tetsu and McCormick, 1999). Overexpression or depletion of Pin1 in cell lines has been shown to regulate the stability and subcellular localization of  $\beta$ -catenin (Ryo et al., 2001). In addition, Pin1 can activate the cyclin D1 promoter not only through AP-1 sites but also through TCF-binding sites that are present (Ryo et al., 2001). Upregulation of Pin1 in breast cancer strongly correlates with increased  $\beta$ -catenin levels in the tumors examined, whereas  $\beta$ -catenin levels are decreased in Pin1-knockout mouse tissues (Ryo et al., 2001).

How does Pin1 regulate  $\beta$ -catenin levels? As shown above, conformational changes caused by Pin1-catalyzed prolyl-isomerization can affect protein stability, phosphorylation status and protein-protein interactions (Hsu et al., 2001; Kops et al., 2002; Liou et al., 2002; Lu et al., 1999a; Lu et al., 1999b; Ryo et al., 2002; Ryo et al., 2001; Shen et al., 1998; Stukenberg and Kirschner, 2001; Wulf et al., 2002; Wulf et al., 2001; Yaffe et al., 1997; Zacchi et al., 2002; Zheng et al., 2002; Zhou et al., 2000). Pin1 binds exclusively to phosphorylated  $\beta$ -catenin, and its binding site has been mapped to the pSer<sup>246</sup>-Pro motif (Ryo et al., 2001). This motif is located at an exposed loop region between the two helices at the third armadillo repeat interface, and it is next to the surface that interacts with APC in the three-dimensional structure of  $\beta$ -catenin (Graham et al., 2000; Huber et al., 1997; von Kries et al., 2000). APC is the shuttling protein that exports nuclear  $\beta$ -catenin to the cytoplasm for degradation (Bienz, 2002; Henderson, 2000; Neufeld et al., 2000; Rosin-Arbesfeld et al., 2000). Mutations of Phe<sup>253</sup> and Phe<sup>293</sup> in  $\beta$ -catenin abolish its ability to bind to APC (Graham et al., 2000; Huber et al., 1997; von Kries et al., 2000). Similarly, Pin1 binding and isomerization specifically inhibits the interaction between  $\beta$ -catenin and APC, resulting in the nuclear accumulation and stabilization of  $\beta$ -catenin. Pin1-dependent prolyl-isomerization thus appears to be a novel mechanism for the regulation of  $\beta$ -catenin-APC interaction. Given the overexpression of Pin1 in many cancers, this mechanism might up-regulate  $\beta$ -catenin activity in tumors such as breast cancer, in which APC and/or  $\beta$ -catenin mutations are not common (Ryo et al., 2001).

### Regulation of cyclin D1 protein levels

*Pin1*-knockout mice were originally reported to develop normally and to have no phenotype (Fujimori et al., 1999). More recent analyses indicate that these mice display a range of cell proliferative abnormalities, including decreased body size, testicular atrophy and retinal degeneration, a phenotype strongly reminiscent of the cyclin-D1-knockout mice (Liou et al., 2002). Most strikingly, the breast epithelial compartment in *Pin1*-null mice cannot undergo the massive proliferative changes associated with pregnancy. Importantly, cyclin D1 protein levels are significantly decreased in every tissue that displays a severe phenotype (Liou et al., 2002). These results strongly suggest that Pin1 is essential for the regulation of cyclin D1 in vivo. Interestingly, mouse models in which AP-1 or  $\beta$ -catenin/APC function is perturbed do not display defects associated with lack of cyclin D1 (Behrens et al., 1999; Brown et al., 1998; Haegel et al., 1995; Shaulian and Karin, 2001), indicating that other Pin1-dependent mechanisms for regulating cyclin D1 exist. Indeed, cyclin D1 mRNA levels in *Pin1*-knockout MEFs are significantly reduced probably



because of defective Jun/AP-1 and  $\beta$ -catenin/TCF pathways. However, the reduction of cyclin D1 protein levels is disproportionately greater (Liou et al., 2002). Phosphorylation of cyclin D1 by GSK-3 $\beta$  on Thr286-Pro site regulates turnover and localization of cyclin D1 by enhancing its binding to CRM1, a nuclear exporter of cyclin D1, which leads to degradation of cyclin D1 in the cytoplasm (Alt et al., 2000; Diehl et al., 1998; Diehl et al., 1997; Fukuda et al., 1997). Pin1 can bind to and presumably isomerize the phosphorylated Thr286-Pro motif in cyclin D1, which may inhibit its interaction with CRM1. This would stabilize cyclin D1 by preventing its nuclear export and proteolysis in the cytoplasm (Liou et al., 2002). Pin1 thus seems to regulate cyclin D1 function at both the transcriptional and post-translational levels, and this may explain why the *Pin1*-null phenotype resembles the cyclin-D1-null phenotype. It is also consistent with the finding that Pin1-deficient MEFs cannot effectively restart proliferation in response to serum stimulation after G0 arrest (Fujimori et al., 1999). These results indicate that Pin1 is required for progression through G0 to S in addition to mitosis.

### Regulation of pin1 transcription and function by oncogenic pathways

How is Pin1 activated in cancer cells? The *PIN1* promoter sequence has neither a TATA nor CAAT box but has two putative GC boxes and three putative E2F-binding sites (Ryo et al., 2002). Indeed, E2F family proteins activate the *PIN1* promoter through these E2F-binding sites. E2F proteins also bind the *PIN1* promoter in vitro and in vivo, and increased Pin1 levels in breast cancer cell lines correlate with an increase in binding of E2F to the *PIN1* promoter. Moreover, overexpression of E2F enhances *PIN1* promoter activity and mRNA levels in breast cancer cells. In common with many other E2F-target genes (Fry et al., 1997; Nevins, 2001; Ohtani et al., 1995), *PIN1* transcription and its protein levels fluctuate during cell cycle progression in non-neoplastic cells (Ryo et al., 2002) but not in transformed cells (Shen et al., 1998). Interestingly, aberrantly high E2F1 levels have been described in breast cancer (Zhang et al., 2000), and therefore it is possible that deregulation of E2F plays a key role in the upregulation of Pin1 in breast cancer. Since deregulation of the Rb/E2F pathway is also found in many other cancer types and contributes to the oncogenesis of a number of human cancers (Johnson and Schneider-Broussard, 1998; Nevins, 2001; Weinberg, 1995), deregulation of the Rb/E2F pathway may cause Pin1 overexpression in other cancer cells.

In addition to being transcriptionally regulated, Pin1 is also regulated by post-translational controls. One such regulatory mechanism is phosphorylation. Phosphorylation of the Pin1 WW domain inhibits its ability to bind target proteins and regulates the subcellular localization of Pin1 (Lu, P. J. et al., 2002). Dephosphorylated Pin1 accumulates during the G2/M transition in HeLa cells, whereas in G1 and S phase phosphorylated Pin1 is predominant (Lu, P. J. et al., 2002). In human breast tumors, the dephosphorylated, and presumably active, form of Pin1 accumulates (Wulf et al., 2001). It will be important to identify the specific kinase responsible because, theoretically, this kinase would be able to inhibit Pin1 function, thereby suppressing its ability to activate oncogenic pathways

as described above. Phosphospecific antibodies will help us to assess more accurately the ratio of phosphorylated to dephosphorylated Pin1 and may become an important tool for identifying the kinase/phosphatase activities regulating the phosphorylation status of Pin1. Finally, Pin1 levels have been shown to be decreased upon prolonged exposure to the microtubule-targeting drug Taxol, which can apparently be prevented by some proteasome inhibitors; this suggests that Pin1 is also subjected to proteolytic regulation (Basu et al., 2002). However, direct evidence for such a regulatory mechanism has not yet been provided.

### Pin1 overexpression and cell transformation

Recent data support the notion that Pin1 can at least partially transform mammary epithelial cells (Ryo et al., 2002). Pin1 confers anchorage-independent cell growth on the non-transformed mammary epithelial cell line MCF-10A (Ryo et al., 2002). Furthermore, its overexpression interferes with normal cell differentiation and acinar formation in a three-dimensional matrigel assay (Muthuswamy et al., 2001; Petersen et al., 1992; Ryo et al., 2002). However, Pin1 overexpression does not affect cell growth or cell morphology under normal culture conditions. Overexpression of Pin1 might thus trigger some early events during cell transformation (Ryo et al., 2002), although it remains to be determined whether Pin1 itself is sufficient for transformation in vivo. It is possible that elevated Pin1 levels become oncogenic only after a 'first hit', i.e. activation of an oncogenic pathway that leads to substrate phosphorylation that allows Pin1 to exert this function. The observation that Pin1 greatly enhances and facilitates transformation by oncogenic Neu and Ras in mammary epithelial cells is consistent with this hypothesis (Ryo et al., 2002).

Neu or Ras signaling is frequently deregulated in breast cancers, although mutations and amplifications of these genes are rarely observed (Andrechek and Muller, 2000; Harari and Yarden, 2000). Transgenic overexpression of MMTV-Ha-Ras or MMTV-Neu potently induces mammary tumors by stimulating cyclin D1. However, transgenic overexpression of MMTV-cyclin D1 is much less tumorigenic (Muller et al., 1988; Sinn et al., 1987; Wang et al., 1994). In addition, constitutive overexpression of cyclin D1 alone cannot transform MCF-10A cells, nor is it sufficient to prevent G1 arrest induced by EGF deprivation (Chou et al., 1999). These discrepancies could be explained by the findings that cyclin D1 is regulated not only by transcriptional activation but also by the post-translational stabilization described above. In contrast to wild-type cyclin D1, the mutant cyclin D1<sup>T286A</sup> is stable and functions as a constitutively active mutant that can potently transform fibroblasts (Alt et al., 2000). Both transcriptional activation and post-translational stabilization of cyclin D1 thus seem to be critical for tumor development induced by Neu/Ras signaling.

Similarly to cyclin D1, Pin1 is highly overexpressed in the mammary glands of transgenic mice that overexpress MMTV-Neu or MMTV-Ha-Ras (Muller et al., 1988; Ryo et al., 2002; Sinn et al., 1987). Inhibition of Pin1 by a dominant negative mutant or an antisense construct dramatically reduces both cell proliferation and the transformation induced by the Neu and Ras oncogenes. This reduction can be reversed by expression

of the constitutively active cyclin D1 T286A mutant that is resistant to Pin1 inhibition (Ryo et al., 2002). These results suggest that cyclin D1 is a specific downstream target of Pin1 for oncogenesis. Cyclin D1 is overexpressed in 50% of all breast cancers, but genetic amplification accounts for only 10% of this overexpression (Sutherland and Musgrove, 2002). Pin1 therefore probably plays an important role in maintaining cyclin D1 levels sufficient for transformation of mammary epithelial cells.

### Regulation of p53 in the DNA damage response

The tumor suppressor protein p53 regulates multiple cellular functions, including cell cycle checkpoints, genomic stability and apoptosis (Colman et al., 2000; Lakin and Jackson, 1999; Meek, 1999; Ryan et al., 2001; Taylor and Stark, 2001; Wahl and Carr, 2001). DNA damage leads to the stabilization and accumulation of p53, which plays a pivotal role in transcriptional activation of the cell cycle inhibitor p21 and cell cycle arrest. This prolonged half-life of p53 is at least partially due to its dissociation from the ubiquitin ligase MDM2. The increase in p53 stability and/or transcriptional activity depends critically on its phosphorylation on multiple serine/threonine residues, including those preceding prolines (Abraham et al., 2000; Blaydes et al., 2001; Bulavin et al., 1999; Buschmann et al., 2001; Milner et al., 1990; Sakaguchi et al., 1998; Sanchez-Prieto et al., 2000; Turenne et al., 2001). Recent results indicate a new role of Pin1 in the DNA damage response. Pin1 is an indispensable positive regulator of p53 in response to DNA damage induced by genotoxic drug treatment or UV radiation (Zacchi et al., 2002; Zheng et al., 2002) or ionizing radiation (Wulf et al., 2002; Zacchi, 2002). DNA damage enhances the specific interaction between Pin1 and p53, which depends on the WW domain in Pin1 and specific phosphorylated Ser-Pro motifs in p53. Pin1 binds to p53 at phosphorylated Ser33 and Ser46 following exposure to ionizing radiation (Wulf et al., 2002) and at phosphorylated Ser33, Thr81 and Ser315 following exposure to UV radiation or genotoxic drug treatment (Zacchi et al., 2002; Zheng et al., 2002). More importantly, Pin1 is required for the stabilization of the p53 protein after DNA damage, preventing p53 from binding to its ubiquitin ligase, MDM2 (Wulf et al., 2002; Zacchi et al., 2002). In addition, Pin1 increases the transcriptional activity of p53 towards the *p21* and *MDM2* promoters (Wulf et al., 2002; Zacchi et al., 2002; Zheng et al., 2002). Given that phosphorylation of p53 by various kinases, such as Chk1, ATM and MAP kinases, is believed to play a central role in induction of p53 by DNA damage, these results indicate that Pin1-dependent phosphorylation-dependent isomerization is a new and critical mechanism to control p53 stability and function after it has been phosphorylated.

The physiological consequences of Pin1 loss in normal cells are still controversial. Zheng et al. (Zheng et al., 2002) and Wulf et al. (Wulf et al., 2002) show that Pin1 is required for maintaining the DNA-damage cell cycle checkpoint by inducing the cell cycle inhibitor p21, which will protect cells from DNA damage-induced cell death (Wulf et al., 2002; Zheng et al., 2002). In contrast, Zacchi et al. claim that Pin1 accelerates apoptosis by enhancing pro-apoptotic genes downstream of p53, such as Bax and DR2/Killer (Zacchi et al., 2002). This discrepancy may reflect the fact that p53 induces

sets of genes required for cell cycle arrest and apoptosis, depending on the cellular context and intensity and timing of the respective DNA damage (Colman et al., 2000; Lakin and Jackson, 1999; Meek, 1999; Ryan et al., 2001; Taylor and Stark, 2001; Wahl and Carr, 2001). Careful *in vivo* analysis of the effects of different types of genotoxic insult may clarify whether Pin1-mediated prolyl isomerization of p53 directs the cells in a given cell towards apoptosis or towards cell cycle arrest.

These results are initially counterintuitive: why would a protein that amplifies oncogenic signals also activate a tumor suppressor gene? Proline-directed phosphorylation plays an important role in both the promotion and suppression of oncogenesis, and therefore Pin1 is likely to be involved in both processes. It has been well established that many proteins are involved in both processes. For example, transcription factors such as Myc and E2F family members participate in a complex signaling network that regulates cell growth, differentiation, cell survival and apoptosis in non-malignant cells. Only in a permissive environment will overexpressed or mutated forms of these proteins contribute to carcinogenesis (Oster et al., 2002; Trimarchi and Lees, 2002; Zhou and Hurlin, 2001). Therefore, it may be important to distinguish the physiological function of Pin1 in normal cells from its pathological role in cancers where Pin1 is deregulated. It is likely that, under physiological conditions in normal cells, Pin1-mediated p53 regulation is important for cell cycle checkpoint regulation and the maintenance of genomic stability. In cancer cells, however, this mechanism may be defective because oncogenic signalling pathways induced by Pin1 overexpression may override the DNA damage repair mechanisms and/or because p53 is absent or mutated in many cancer cell types. Interestingly, Pin1 can also stabilize p53 mutants with the same efficacy as the wild-type protein (G.W. and K.P.L., unpublished results). Since a cellular environment in which Myc and/or Ras expression is deregulated can favor the selection of p53 mutations (Chikatsu et al., 2002) and since some p53 mutants function as dominant negative mutants (de Vries et al., 2002; Monti et al., 2002), Pin1 overexpression in the context of a mutated *p53* gene might even contribute to genomic instability in cancer cells. However, further studies are needed to define the physiological and pathological roles of Pin1-mediated p53 regulation.

### Is Pin1 an oncogene or a catalyst for oncogenic activation?

A defining feature of oncogenes is that their mutation or amplification is associated with oncogenesis. To date, genetic alterations of the *PIN1* gene in cancer cells have not yet been described. However, Pin1 levels are upregulated in cancer cells, probably as a result of the deregulation of the E2F/Rb pathway, which occurs in >80% of human malignancies (Nevins, 2001). The activity of Pin1 depends critically on the phosphorylation status of its substrate proteins (Liou et al., 2002; Lu et al., 1999b; Ryo et al., 2001; Shen et al., 1998; Stukenberg and Kirschner, 2001; Wulf et al., 2001; Yaffe et al., 1997; Zhou et al., 2000). Without prior phosphorylation of these targets on Ser/Thr-Pro motifs, Pin1 cannot bind and catalyze prolyl-isomerization. In cancer cells, a wave of serine and threonine phosphorylation occurs as a result of oncogenic signaling (Blume-Jensen and Hunter, 2001; Hunter, 1995). We propose

that Pin1 overexpression cooperates with these activated kinases to promote cell proliferation and transformation. In this model, Pin1 would respond to and translate oncogenic signaling into the actual events of cancer cell growth. Whereas Pin1 itself may not be sufficient for complete cell transformation, it would be an indispensable translator and amplifier of oncogenic signal transduction. The fact that Pin1 depends on the presence of oncogenes such as Ras or Neu to transform cells fully in vitro is consistent with this idea. This means that the action of Pin1 might depend entirely on the cellular context and may vary significantly with cell type, proliferative status and age. For example, *Pin1*-knockout mice develop normally and do not show any significant phenotype at a young age. However, after several months, the mice exhibit age-dependent proliferative disorders in specific tissues (Liou et al., 2002). Studies on the incidence and distribution of tumor development in *Pin1*-transgenic or *Pin1*-deficient mice in the presence or absence of other oncogenes will be important to address the role of Pin1 in oncogenesis in vivo.

Pin1 thus functions at multiple steps in oncogenic signaling pathways as an 'oncogenic catalyst' (Fig. 2). It collaborates with Ras/JNK signaling to increase the transcriptional activity of Jun towards cyclin D1 (Wulf et al., 2001). It also activates  $\beta$ -catenin, which can induce the transcription of the cyclin D1 gene, *Jun* and *Myc* (Behrens et al., 1996; He et al., 1998; Mann et al., 1999; Molenaar et al., 1996; Ryo et al., 2002; Tetsu and McCormick, 1999). In addition, *Myc* can enhance cyclin D1 function by inducing Cdk4 expression (Hermeking et al., 2000) and also directly induce *E2F* family genes (Leone et al., 2000; Sears et al., 1997). These molecules act synergistically to regulate cyclin D1 and E2F function. Finally, *Pin1* itself is further upregulated by E2F activation in a positive feedback loop (Ryo et al., 2002) (Fig. 2). The amplification of this positive feedback pathway may play a role in aberrant cell proliferation and oncogenesis.

### Therapeutic implications

Several lines of evidence suggest that inhibition of Pin1 can suppress oncogenesis, offering an attractive option for anti-cancer therapy. First, Pin1 has an extraordinarily high substrate specificity and well-defined active site (Lu et al., 1999b; Ranganathan et al., 1997; Shen et al., 1998; Verdecia et al., 2000; Yaffe et al., 1997). Historically, it has been much easier to develop inhibitors specific for an enzyme, such as Pin1, than for a non-enzymatic protein, such as cyclin D1. Second, Pin1 is overexpressed in cancer cells and can potentiate the function of some oncogenes (Ryo et al., 2002; Ryo et al., 2001; Wulf et al., 2001). Third, overexpression of Pin1 can confer transforming properties on mammary epithelial cells and also enhance transformed phenotypes of mammary epithelial cells induced by Neu and Ras (Ryo et al., 2002). Fourth, depletion of Pin1 using antisense PIN1 or dominant negative Pin1 causes cancer cells to enter mitotic block and apoptosis in transient transfection (Lu et al., 1996; Lu, P. J. et al., 2002; Rippmann et al., 2000). Recent reports that Pin1 associates with the anti-apoptotic protein Bcl-2 in mitosis (Basu et al., 2002; Pathan et al., 2001) suggest that apoptosis induced by Pin1 inhibition may occur via modulation of Bcl-2 function, although the biological significance of this interaction remains to be elucidated. Fifth, inhibition of Pin1 by stable expression of

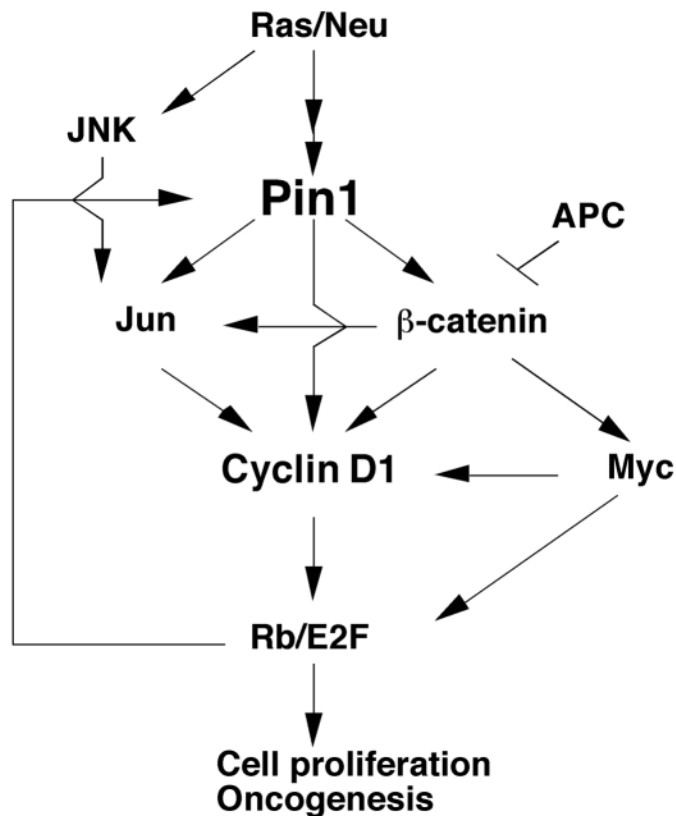

**Fig. 2.** Pin1 functions as a critical catalyst for integrating multiple oncogenic signaling pathways. Pin1 gene expression is induced by growth factor signaling through Neu and Ras signaling. Ras signaling induces JNK/SAPK activity to phosphorylate Jun. Subsequently, Pin1 binds to and isomerizes phosphorylated Jun to enhance its transcriptional activity. In parallel, Pin1 activates the  $\beta$ -catenin pathway by preventing  $\beta$ -catenin binding to APC, which can induce Jun gene expression. These signaling cascades eventually lead to an increase in cyclin D1 transcription. Furthermore, Pin1 also directly binds to and stabilizes cyclin D1 protein. In addition, Pin1 can induce the c-Myc gene through the activation of the  $\beta$ -catenin pathway, which can then enhance cyclin D1 function by inducing Cdk4 gene expression and/or directly activate E2F family genes. Finally, E2F can induce Pin1 expression in a positive feedback loop involving the cyclin D1/E2F pathway.

dominant negative Pin1 suppresses the transformed phenotypes induced by Ras/Neu, which can be reversed by the constitutively active cyclin D1 mutant that is resistant to Pin1 inhibition (Ryo et al., 2002). Finally, since *Pin1*-knockout mice do reach adulthood despite some cell proliferative abnormalities, especially in old age (Fujimori et al., 1999; Liou et al., 2002), an anti-Pin1 therapy might not have general toxic effects.

The feasibility of therapeutic inhibition of Pin1 has not yet been explored. In contrast to cyclophilins and FK506-binding proteins, where highly specific inhibitors are well characterized and widely used clinically (Fischer, 1994; Hunter, 1998; Schreiber, 1991), the only known Pin1 inhibitor is Juglone (Hennig et al., 1998). Juglone covalently inactivates a unique cysteine residue in the active site of Pin1-type and parvulin-type isomerases. Juglone has some anti-cancer activity and has been used as a Pin1 inhibitor in several studies in cells (Chao



et al., 2001; He et al., 2001; Rippmann et al., 2000). However, given that Juglone potently inhibits many other proteins and enzymes (Chao et al., 2001; Dhaiman, 1996; Munday and Munday, 2000; Muto et al., 1987), it is unlikely to be Pin1 specific in the cell. Therefore, there is a need for the development of Pin1-specific inhibitors. In addition to providing powerful tools for dissecting Pin1 function *in vivo*, such Pin1-specific inhibitors may open a new avenue for anticancer treatment. They may themselves be highly effective anticancer drugs or become valuable adjuncts to established chemotherapeutic regimen.

## Conclusions and perspectives

It has become evident that phosphorylation-dependent prolyl isomerization is a previously uncharacterized post-phosphorylation signaling mechanism in cell proliferation and transformation. Following phosphorylation induced by oncogenic signaling pathways, *Pin1* catalyzed prolyl-isomerization is able to induce conformational changes and thereby to regulate the function of phosphorylated proteins. Interestingly, the level and activity of Pin1 itself are also upregulated by oncogenic pathways. Therefore, Pin1 may function as a critical catalyst that amplifies and translates multiple oncogenic signaling mechanisms during oncogenesis. Inhibition of Pin1 may thus provide a unique way of disrupting oncogenic pathways and therefore become an appealing target for novel anticancer therapies. However, further experiments, including *in vivo* studies using Pin1-knockout and Pin1-transgenic mouse models in the presence or absence of other oncogenes are necessary to elucidate the function and regulation of Pin1 in cell growth regulation and oncogenesis.

We are grateful to B. Neel, L. Cantley, T. Hunter, J. Nevins, C. Sherr, P. Sicinski, J. Brugge, M. Yamamoto and M. Yoshida for constructive discussions and/or suggestions and to K. Perrem and X. Zhou for their important contributions. A.R. is a Leukemia and Lymphoma Society Special Fellow, Y.-C.L. is a Canadian Institute of Health Research Fellow and G.W. is a recipient of a Mentored Clinical Investigator Award from NIH (CA093655). K.P.L. is a Pew Scholar and a Leukemia and Lymphoma Society Scholar. The studies performed in the authors' laboratory were supported by NIH grants GM56230, GM58556 and AG17870 to K.P.L.

## References

- Abraham, J., Kelly, J., Thibault, P. and Benchimol, S. (2000). Post-translational modification of p53 protein in response to ionizing radiation analyzed by mass spectrometry. *J. Mol. Biol.* **295**, 853-864.
- Albanese, C., Johnson, J., Watanabe, G., Eklund, N., Vu, D., Arnold, A. and Pestell, R. G. (1995). Transforming p21ras mutants and c-Ets-2 activate the cyclin D1 promoter through distinguishable regions. *J. Biol. Chem.* **270**, 23589-23597.
- Albanese, C., D'Amico, M., Reutens, A. T., Fu, M., Watanabe, G., Lee, R. J., Kitsis, R. N., Henglein, B., Avantaggiati, M., Somasundaram, K., Thimmapaya, B. and Pestell, R. G. (1999). Activation of the cyclin D1 gene by the E1A-associated protein p300 through AP-1 inhibits cellular apoptosis. *J. Biol. Chem.* **274**, 34186-34195.
- Albert, A., Lavoie, S. and Vincent, M. (1999). A hyperphosphorylated form of RNA polymerase II is the major interphase antigen of the phosphoprotein antibody MPM-2 and interacts with the peptidyl-prolyl isomerase Pin1. *J. Cell Sci.* **112**, 2493-2500.
- Alt, J. R., Cleveland, J. L., Hannink, M. and Diehl, J. A. (2000). Phosphorylation-dependent regulation of cyclin D1 nuclear export and cyclin D1-dependent cellular transformation. *Genes Dev.* **14**, 3102-3114.
- Andrechek, E. R. and Muller, W. J. (2000). Tyrosine kinase signalling in breast cancer: tyrosine kinase-mediated signal transduction in transgenic mouse models of human breast cancer. *Breast Cancer Res.* **2**, 211-216.
- Arber, N., Doki, Y., Han, E. K., Sgambato, A., Zhou, P., Kim, N. H., Delohery, T., Klein, M. G., Holt, P. R. and Weinstein, I. B. (1997). Antisense to cyclin D1 inhibits the growth and tumorigenicity of human colon cancer cells. *Cancer Res.* **57**, 1569-1574.
- Arevalo-Rodriguez, M., Cardenas, M. E., Wu, X., Hanes, S. D. and Heitman, J. (2000). Cyclophilin A and Ess1 interact with and regulate silencing by the Sin3-Rpd3 histone deacetylase. *EMBO J.* **19**, 3739-3749.
- Bakiri, L., Lallemand, D., Bossy-Wetzel, E. and Yaniv, M. (2000). Cell cycle-dependent variations in c-Jun and JunB phosphorylation: a role in the control of cyclin D1 expression. *EMBO J.* **19**, 2056-2068.
- Bartkova, J., Lukas, J., Muller, H., Lutzhoft, D., Strauss, M. and Bartek, J. (1994). Cyclin D1 protein expression and function in human breast cancer. *Int. J. Cancer* **57**, 353-361.
- Basu, A., Das, M., Qanungo, S., Fan, X. J., DuBois, G. and Haldar, S. (2002). Proteasomal Degradation of Human Peptidyl Prolyl Isomerase Pin1-pointing Phospho Bcl2 toward Dephosphorylation. *Neoplasia* **4**, 218-227.
- Behrens, A., Sibilio, M. and Wagner, E. F. (1999). Amino-terminal phosphorylation of c-Jun regulates stress-induced apoptosis and cellular proliferation. *Nat Genet* **21**, 326-329.
- Behrens, J., von Kries, J. P., Kuhl, M., Bruhn, L., Wedlich, D., Grosschedl, R. and Birchmeier, W. (1996). Functional interaction of beta-catenin with the transcription factor LEF-1. *Nature* **382**, 638-642.
- Bienz, M. (2002). The subcellular destinations of APC proteins. *Nat. Rev. Mol. Cell Biol.* **3**, 328-338.
- Binetruy, B., Smeal, T. and Karin, M. (1991). Ha-Ras augments c-Jun activity and stimulates phosphorylation of its activation domain. *Nature* **351**, 122-127.
- Blaydes, J. P., Luciani, M. G., Pospisilova, S., Ball, H. M., Vojtesek, B. and Hupp, T. R. (2001). Stoichiometric phosphorylation of human p53 at Ser315 stimulates p53-dependent transcription. *J. Biol. Chem.* **276**, 4699-4708.
- Blume-Jensen, P. and Hunter, T. (2001). Oncogenic kinase signalling. *Nature* **411**, 355-365.
- Brown, J. R., Nigh, E., Lee, R. J., Ye, H., Thompson, M. A., Saudou, F., Pestell, R. G. and Greenberg, M. E. (1998). Fos family members induce cell cycle entry by activating cyclin D1. *Mol. Cell Biol.* **18**, 5609-5619.
- Brown, N. R., Noble, M. E., Endicott, J. A. and Johnson, L. N. (1999). The structural basis for specificity of substrate and recruitment peptides for cyclin-dependent kinases. *Nat. Cell Biol.* **1**, 438-443.
- Bulavin, D. V., Saito, S., Hollander, M. C., Sakaguchi, K., Anderson, C. W., Appella, E. and Fornace, A. J., Jr. (1999). Phosphorylation of human p53 by p38 kinase coordinates N-terminal phosphorylation and apoptosis in response to UV radiation. *EMBO J.* **18**, 6845-6854.
- Buschmann, T., Potapova, O., Bar-Shira, A., Ivanov, V. N., Fuchs, S. Y., Henderson, S., Fried, V. A., Minamoto, T., Alarcon-Vargas, D., Pincus, M. R. et al. (2001). Jun NH2-terminal kinase phosphorylation of p53 on Thr-81 is important for p53 stabilization and transcriptional activities in response to stress. *Mol. Cell Biol.* **21**, 2743-2754.
- Chao, S. H., Greenleaf, A. L. and Price, D. H. (2001). Juglone, an inhibitor of the peptidyl-prolyl isomerase Pin1, also directly blocks transcription. *Nucleic Acids Res.* **29**, 767-773.
- Chikatsu, N., Nakamura, Y., Sato, H., Fujita, T., Asano, S. and Motokura, T. (2002). p53 mutations and tetraploids under R- and K-selection. *Oncogene* **21**, 3043-3049.
- Chou, J. L., Fan, Z., DeBlasio, T., Koff, A., Rosen, N. and Mendelsohn, J. (1999). Constitutive overexpression of cyclin D1 in human breast epithelial cells does not prevent G1 arrest induced by deprivation of epidermal growth factor. *Breast Cancer Res. Treat.* **55**, 267-283.
- Colman, M. S., Afshari, C. A. and Barrett, J. C. (2000). Regulation of p53 stability and activity in response to genotoxic stress. *Mutat. Res.* **462**, 179-188.
- Crenshaw, D. G., Yang, J., Means, A. R. and Kornbluth, S. (1998). The mitotic peptidyl-prolyl isomerase, Pin1, interacts with Cdc25 and Plx1. *EMBO J.* **17**, 1315-1327.
- de Vries, A., Flores, E. R., Miranda, B., Hsieh, H. M., van Oostrom, C. T., Sage, J. and Jacks, T. (2002). Targeted point mutations of p53 lead to dominant-negative inhibition of wild-type p53 function. *Proc. Natl. Acad. Sci. USA* **99**, 2948-2953.
- Derijard, B., Hibi, M., Wu, I. H., Barrett, T., Su, B., Deng, T., Karin, M. and Davis, R. J. (1994). JNK1: a protein kinase stimulated by UV light and



- Ha-Ras that binds and phosphorylates the c-Jun activation domain. *Cell* **76**, 1025-1037.
- Diehl, J. A., Zindy, F. and Sherr, C. J.** (1997). Inhibition of cyclin D1 phosphorylation on threonine-286 prevents its rapid degradation via the ubiquitin-proteasome pathway. *Genes Dev.* **11**, 957-972.
- Diehl, J. A., Cheng, M., Roussel, M. F. and Sherr, C. J.** (1998). Glycogen synthase kinase-3 $\beta$  regulates cyclin D1 proteolysis and subcellular localization. *Genes Dev.* **12**, 3499-3511.
- Driscoll, B., Wu, L., Buckley, S., Hall, F. L., Anderson, K. D. and Warburton, D.** (1997). Cyclin D1 antisense RNA destabilizes pRb and retards lung cancer cell growth. *Am. J. Physiol.* **273**, L941-L949.
- Duhaiman, A. S.** (1996). Characterization of zeta-crystallin inhibition by juglone. *Biochem. Biophys. Res. Commun.* **218**, 648-652.
- Fischer, G.** (1994). Peptidyl-prolyl cis/trans isomerases. *Angew. Chem. Intl. Ed. Engl.* **33**, 1415-1436.
- Fry, C. J., Slansky, J. E. and Farnham, P. J.** (1997). Position-dependent transcriptional regulation of the murine dihydrofolate reductase promoter by the E2F transactivation domain. *Mol. Cell Biol.* **17**, 1966-1976.
- Fujimori, F., Takahashi, K., Uchida, C. and Uchida, T.** (1999). Mice lacking Pin1 develop normally, but are defective in entering cell cycle from G(0) arrest. *Biochem. Biophys. Res. Commun.* **265**, 658-663.
- Fukuda, M., Asano, S., Nakamura, T., Adachi, M., Yoshida, M., Yanagida, M. and Nishida, E.** (1997). CRM1 is responsible for intracellular transport mediated by the nuclear export signal. *Nature* **390**, 308-311.
- Gerez, L., Mohrmann, K., va Raak, M., Jongeneelen, M., Zhou, X. Z., Lu, K. P. and van der Sluijs, P.** (2000). Accumulation of rab4GTP in the cytoplasm and association with the peptidyl-prolyl isomerase Pin1 during mitosis. *Mol. Biol. Cell* **11**, 2201-2211.
- Gillett, C., Fantl, V., Smith, R., Fisher, C., Bartek, J., Dickson, C., Barnes, D. and Peters, G.** (1994). Amplification and overexpression of cyclin D1 in breast cancer detected by immunohistochemical staining. *Cancer Res.* **54**, 1812-1817.
- Grabl, D., Kuhl, M. and Wedlich, D.** (1999). The Wnt/Wg signal transducer beta-catenin controls fibronectin expression. *Mol. Cell Biol.* **19**, 5576-5587.
- Graham, T. A., Weaver, C., Mao, F., Kimelman, D. and Xu, W.** (2000). Crystal structure of a beta-Catenin/Tcf complex. *Cell* **103**, 885-896.
- Haegel, H., Larue, L., Ohnishi, M., Fedorov, L., Herrenknecht, K. and Kemler, R.** (1995). Lack of beta-catenin affects mouse development at gastrulation. *Development* **121**, 3529-3537.
- Hanes, S. D., Shank, P. R. and Bostian, K. A.** (1989). Sequence and mutational analysis of ESS1, a gene essential for growth in *Saccharomyces cerevisiae*. *Yeast* **5**, 55-72.
- Hani, J., Stumpf, G. and Domdey, H.** (1995). PTF1 encodes an essential protein in *Saccharomyces cerevisiae*, which shows strong homology with a new putative family of PPLases. *FEBS Lett.* **365**, 198-202.
- Hani, J., Schelbert, B., Bernhardt, A., Domdey, H., Fischer, G., Wiebauer, K. and Rahfeld, J. U.** (1999). Mutations in a peptidylprolyl-cis/trans-isomerase gene lead to a defect in 3'-end formation of a pre-mRNA in *Saccharomyces cerevisiae*. *J. Biol. Chem.* **274**, 108-116.
- Harari, D. and Yarden, Y.** (2000). Molecular mechanisms underlying ErbB2/HER2 action in breast cancer. *Oncogene* **19**, 6102-6114.
- He, J., Lau, A. G., Yaffe, M. B. and Hall, R. A.** (2001). Phosphorylation and cell cycle-dependent regulation of the Na<sup>+</sup>/H<sup>+</sup> exchanger regulatory factor (NHERF-1) by cdc2 kinase. *J. Biol. Chem.* **276**, 41559-41565.
- He, T. C., Sparks, A. B., Rago, C., Hermeking, H., Zawel, L., da Costa, L. T., Morin, P. J., Vogelstein, B. and Kinzler, K. W.** (1998). Identification of c-MYC as a target of the APC pathway. *Science* **281**, 1509-1512.
- He, T. C., Chan, T. A., Vogelstein, B. and Kinzler, K. W.** (1999). PPARdelta is an APC-regulated target of nonsteroidal anti-inflammatory drugs. *Cell* **99**, 335-345.
- Henderson, B. R.** (2000). Nuclear-cytoplasmic shuttling of APC regulates beta-catenin subcellular localization and turnover. *Nat. Cell Biol.* **2**, 653-660.
- Hennig, L., Christner, C., Kipping, M., Schelbert, B., Rucknagel, K. P., Grabley, S., Kullertz, G. and Fischer, G.** (1998). Selective inactivation of parvulin-like peptidyl-prolyl cis/trans isomerases by juglone. *Biochemistry* **37**, 5953-5960.
- Hermeking, H., Rago, C., Schuhmacher, M., Li, Q., Barrett, J. F., Obaya, A. J., O'Connell, B. C., Mateyak, M. K., Tam, W., Kohlhuber, F. et al.** (2000). Identification of CDK4 as a target of c-MYC. *Proc. Natl. Acad. Sci. USA* **97**, 2229-2234.
- Hinds, P. W., Dowdy, S. F., Eaton, E. N., Arnold, A. and Weinberg, R. A.** (1994). Function of a human cyclin gene as an oncogene. *Proc. Natl. Acad. Sci. USA* **91**, 709-713.
- Hsu, T., McRackan, D., Vincent, T. S. and Gert de Couet, H.** (2001). *Drosophila* Pin1 prolyl isomerase Dodo is a MAP kinase signal responder during oogenesis. *Nat. Cell Biol.* **3**, 538-543.
- Huang, H. K., Forsburg, S. L., John, U. P., O'Connell, M. J. and Hunter, T.** (2001). Isolation and characterization of the Pin1/Ess1p homologue in *Schizosaccharomyces pombe*. *J. Cell Sci.* **114**, 3779-3788.
- Huber, A. H., Nelson, W. J. and Weis, W. I.** (1997). Three-dimensional structure of the armadillo repeat region of beta-catenin. *Cell* **90**, 871-882.
- Hunter, T.** (1995). Protein kinases and phosphatases: the yin and yang of protein phosphorylation and signaling. *Cell* **80**, 225-236.
- Hunter, T.** (1998). Prolyl isomerase and nuclear function. *Cell* **92**, 141-143.
- Johnson, D. G. and Schneider-Brossard, R.** (1998). Role of E2F in cell cycle control and cancer. *Front. Biosci.* **3**, d447-d448.
- Jonsson, M., Borg, A., Nilbert, M. and Andersson, T.** (2000). Involvement of adenomatous polyposis coli (APC)/beta-catenin signalling in human breast cancer. *Eur. J. Cancer* **36**, 242-248.
- Kamimoto, T., Zama, T., Aoki, R., Muro, Y. and Hagiwara, M.** (2001). Identification of a novel kinesin-related protein KRMP1 as a target for mitotic peptidyl-prolyl isomerase Pin1. *J. Biol. Chem.* **276**, 37520-37528.
- Kinzler, K. W. and Vogelstein, B.** (1996). Lessons from hereditary colorectal cancer. *Cell* **87**, 159-170.
- Kops, O., Zhou, X. Z. and Lu, K. P.** (2002). Pin1 enhances the dephosphorylation of the C-terminal domain of the RNA polymerase II by Fcp1. *FEBS Lett.* **513**, 305-311.
- Kornmann, M., Arber, N. and Korc, M.** (1998). Inhibition of basal and mitogen-stimulated pancreatic cancer cell growth by cyclin D1 antisense is associated with loss of tumorigenicity and potentiation of cytotoxicity to cisplatin. *J. Clin. Invest.* **101**, 344-352.
- Lakin, N. D. and Jackson, S. P.** (1999). Regulation of p53 in response to DNA damage. *Oncogene* **18**, 7644-7655.
- Landrieu, I., de Veylder, L., Fruchart, J. S., Odaert, B., Casteels, P., Portetelle, D., van Montagu, M., Inze, D. and Lippens, G.** (2000). The *Arabidopsis thaliana* PIN1At gene encodes a single-domain phosphorylation-dependent peptidyl prolyl cis/trans isomerase. *J. Biol. Chem.* **275**, 10577-10581.
- Lavoie, S. B., Albert, A. L., Handa, H., Vincent, M. and Bensaude, O.** (2001). The peptidyl-prolyl isomerase Pin1 interacts with hSpt5 phosphorylated by Cdk9. *J. Mol. Biol.* **312**, 675-685.
- Leone, G., Nuckolls, F., Ishida, S., Adams, M., Sears, R., Jakoi, L., Miron, A. and Nevins, J. R.** (2000). Identification of a novel E2F3 product suggests a mechanism for determining specificity of repression by Rb proteins. *Mol. Cell Biol.* **20**, 3626-3632.
- Lin, S. Y., Xia, W., Wang, J. C., Kwong, K. Y., Spohn, B., Wen, Y., Pestell, R. G. and Hung, M. C.** (2000). Beta-catenin, a novel prognostic marker for breast cancer: its roles in cyclin D1 expression and cancer progression. *Proc. Natl. Acad. Sci. USA* **97**, 4262-4266.
- Liou, Y. C., Ryo, R., Huang, H. K., Lu, P. J., Bronson, R., Fujimori, F., Uchida, U., Hunter, T. and Lu, K. P.** (2002). Loss of Pin1 function in the mouse resembles the cyclin D1-null phenotypes. *Proc. Natl. Acad. Sci. USA* **99**, 1335-1340.
- Liu, W., Youn, H. D., Zhou, X. Z., Lu, K. P. and Liu, J. O.** (2001). Binding and regulation of the transcription factor NFAT by the peptidyl prolyl cis-trans isomerase Pin1. *FEBS Lett.* **496**, 105-108.
- Lu, K. P., Hanes, S. D. and Hunter, T.** (1996). A human peptidyl-prolyl isomerase essential for regulation of mitosis. *Nature* **380**, 544-547.
- Lu, K. P., Liou, Y. C. and Vincent, I. J.** (2002a). Proline-directed phosphorylation and isomerization in mitosis and in Alzheimer's disease. *BioEssays* (in press).
- Lu, K. P., Liou, Y. C. and Zhou, X. Z.** (2002b). Pinning down the proline-directed phosphorylation signaling. *Trends Cell Biol.* **12**, 164-172.
- Lu, P. J., Wulf, G., Zhou, X. Z., Davies, P. and Lu, K. P.** (1999a). The prolyl isomerase Pin1 restores the function of Alzheimer-associated phosphorylated tau protein. *Nature* **399**, 784-788.
- Lu, P. J., Zhou, X. Z., Shen, M. and Lu, K. P.** (1999b). A function of WW domains as phosphoserine- or phosphothreonine-binding modules. *Science* **283**, 1325-1328.
- Lu, P. J., Zhou, X. Z., Liou, Y. C., Noel, J. P. and Lu, K. P.** (2002). Critical role of WW domain phosphorylation in regulating its phosphoserine-binding activity and the Pin1 function. *J. Biol. Chem.* **277**, 2381-2384.
- MacLachlan, T. K., Somasundaram, K., Sgagias, M., Shifman, Y., Muschel, R. J., Cowan, K. H. and El-Deiry, W. S.** (2000). BRCA1 effects on the cell cycle and the DNA damage response are linked to altered gene expression. *J. Biol. Chem.* **275**, 2777-2785.
- Mann, B., Gelos, M., Siedow, A., Hanski, M. L., Gratchev, A., Ilyas, M.,**

- Bodmer, W. F., Moyer, M. P., Riecken, E. O., Buhr, H. J. and Hanski, C.** (1999). Target genes of beta-catenin-T cell-factor/lymphoid-enhancer-factor signaling in human colorectal carcinomas. *Proc. Natl. Acad. Sci. USA* **96**, 1603-1608.
- Meek, D. W.** (1999). Mechanisms of switching on p53: a role for covalent modification? *Oncogene* **18**, 7666-7675.
- Messenger, M. M., Saulnier, R. B., Gilchrist, A. D., Diamond, P., Gorbysky, G. J. and Litchfield, D. W.** (2002). Interactions between protein kinase CK2 and Pin1. Evidence for phosphorylation-dependent interactions. *J. Biol. Chem.* **277**, 23054-23064.
- Metzner, M., Stoller, G., Rucknagel, K. P., Lu, K. P., Fischer, G., Luckner, M. and Kullertz, G.** (2001). Functional replacement of the essential ESS1 in yeast by the plant parvulin DIPar13. *J. Biol. Chem.* **276**, 13524-13529.
- Milner, J., Cook, A. and Mason, J.** (1990). p53 is associated with p34cdc2 in transformed cells. *EMBO J.* **9**, 2885-2889.
- Molenaar, M., van de Wetering, M., Oosterwegel, M., Peterson-Maduro, J., Godsave, S., Korinek, V., Roose, J., Destree, O. and Clevers, H.** (1996). XTcf-3 transcription factor mediates beta-catenin-induced axis formation in *Xenopus* embryos. *Cell* **86**, 391-399.
- Monti, P., P. C., Ciribilli, Y., Iannone, R., Inga, A., Abbondandolo, A., Resnick, M. A. and Fronza, G.** (2002). Tumour p53 mutations exhibit promoter selective dominance over wild type p53. *Oncogene* **21**, 1641-1648.
- Moon, R. T., Bowerman, B., Boutros, M. and Perrimon, N.** (2002). The promise and perils of Wnt signaling through beta-catenin. *Science* **296**, 1644-1646.
- Morin, P. J.** (1999). beta-catenin signaling and cancer. *Bioessays* **21**, 1021-1030.
- Morris, D. P., Phatnani, H. P. and Greenleaf, A. L.** (1999). Phospho-carboxyl-terminal domain binding and the role of a prolyl isomerase in pre-mRNA 3'-End formation. *J. Biol. Chem.* **274**, 31583-31587.
- Muller, W. J., Sinn, E., Pattengale, P. K., Wallace, R. and Leder, P.** (1988). Single-step induction of mammary adenocarcinoma in transgenic mice bearing the activated c-neu oncogene. *Cell* **54**, 105-115.
- Munday, R. and Munday, C. M.** (2000). Induction of quinone reductase and glutathione transferase in rat tissues by juglone and plumbagin. *Planta Med.* **66**, 399-402.
- Muthuswamy, S. K., Li, D., Lelievre, S., Bissell, M. J. and Brugge, J. S.** (2001). ErbB2, but not ErbB1, reinitiates proliferation and induces luminal repopulation in epithelial acini. *Nat. Cell Biol.* **3**, 785-792.
- Muto, N., Inouye, K., Inada, A., Nakanishi, T. and Tan, L.** (1987). Inhibition of cytochrome P-450-linked monooxygenase systems by naphthoquinones. *Biochem. Biophys. Res. Commun.* **146**, 487-494.
- Neufeld, K. L., Nix, D. A., Bogerd, H., Kang, Y., Beckerle, M. C., Cullen, B. R. and White, R. L.** (2000). Adenomatous polyposis coli protein contains two nuclear export signals and shuttles between the nucleus and cytoplasm. *Proc. Natl. Acad. Sci. USA* **97**, 12085-12090.
- Nevins, J. R.** (2001). The Rb/E2F pathway and cancer. *Hum. Mol. Genet.* **10**, 699-703.
- Ohtani, K., DeGregori, J. and Nevins, J. R.** (1995). Regulation of the cyclin E gene by transcription factor E2F1. *Proc. Natl. Acad. Sci. USA* **92**, 12146-12150.
- Oster, S. K., Ho, C. S., Soucie, E. L. and Penn, L. Z.** (2002). The myc oncogene: Marvelous Complex. *Adv. Cancer Res.* **84**, 81-154.
- Pathan, N., Aime-Sempe, C., Kitada, S., Haldar, S. and Reed, J. C.** (2001). Microtubule-targeting drugs induce Bcl-2 phosphorylation and association with Pin1. *Neoplasia* **3**, 70-79.
- Patra, D., Wang, S. X., Kumagai, A. and Dunphy, W. G.** (1999). The *Xenopus* Suc1/Cks protein promotes the phosphorylation of G(2)/M regulators. *J. Biol. Chem.* **274**, 36839-36842.
- Petersen, O. W., Ronnov-Jessen, L., Howlett, A. R. and Bissell, M. J.** (1992). Interaction with basement membrane serves to rapidly distinguish growth and differentiation pattern of normal and malignant human breast epithelial cells. *Proc. Natl. Acad. Sci. USA* **89**, 9064-9068.
- Polakis, P.** (2000). Wnt signaling and cancer. *Genes Dev.* **14**, 1837-1851.
- Ranganathan, R., Lu, K. P., Hunter, T. and Noel, J. P.** (1997). Structural and functional analysis of the mitotic peptidyl-prolyl isomerase Pin1 suggests that substrate recognition is phosphorylation dependent. *Cell* **89**, 875-886.
- Rippmann, J. F., Hobbie, S., Daiber, C., Guilliard, B., Bauer, M., Birk, J., Nar, H., Garin-Chesa, P., Rettig, W. J. and Schnapp, A.** (2000). Phosphorylation-dependent proline isomerization catalyzed by Pin1 is essential for tumor cell survival and entry into mitosis [In Process Citation]. *Cell Growth Differ.* **11**, 409-416.
- Roose, J., Huls, G., van Beest, M., Moerer, P., van der Horn, K., Goldschmeding, R., Logtenberg, T. and Clevers, H.** (1999). Synergy between tumor suppressor APC and the beta-catenin-Tcf4 target Tcf1. *Science* **285**, 1923-1926.
- Rosin-Arbesfeld, R., Townsley, F. and Bienz, M.** (2000). The APC tumour suppressor has a nuclear export function. *Nature* **406**, 1009-1012.
- Ryan, K. M., Phillips, A. C. and Vousden, K. H.** (2001). Regulation and function of the p53 tumor suppressor protein. *Curr. Opin. Cell Biol.* **13**, 332-337.
- Ryo, A., Nakamura, N., Wulf, G., Liou, Y. C. and Lu, K. P.** (2001). Pin1 regulates turnover and subcellular localization of beta-catenin by inhibiting its interaction with APC. *Nat. Cell Biol.* **3**, 793-801.
- Ryo, A., Liou, Y. C., Wulf, G., Nakamura, M., Lee, S. W. and Lu, K. P.** (2002). PIN1 Is an E2F Target Gene Essential for Neu/Ras-Induced Transformation of Mammary Epithelial Cells. *Mol. Cell Biol.* **22**, 5281-5295.
- Sakaguchi, K., Herrera, J. E., Saito, S., Miki, T., Bustin, M., Vassilev, A., Anderson, C. W. and Appella, E.** (1998). DNA damage activates p53 through a phosphorylation-acetylation cascade. *Genes Dev.* **12**, 2831-2841.
- Sanchez-Prieto, R., Rojas, J. M., Taya, Y. and Gutkind, J. S.** (2000). A role for the p38 mitogen-activated protein kinase pathway in the transcriptional activation of p53 on genotoxic stress by chemotherapeutic agents. *Cancer Res.* **60**, 2464-2472.
- Satoh, S., Daigo, Y., Furukawa, Y., Kato, T., Miwa, N., Nishiwaki, T., Kawasoe, T., Ishiguro, H., Fujita, M., Tokino, T. et al.** (2000). AXIN1 mutations in hepatocellular carcinomas and growth suppression in cancer cells by virus-mediated transfer of AXIN1. *Nat. Genet.* **24**, 245-250.
- Schlosshauer, P. W., Brown, S. A., Eisinger, K., Yan, Q., Guglielminetti, E. R., Parsons, R., Ellenson, L. H. and Kitajewski, J.** (2000). APC truncation and increased beta-catenin levels in a human breast cancer cell line. *Carcinogenesis* **21**, 1453-1456.
- Schreiber, S. L.** (1991). Chemistry and biology of the immunophilins and their immunosuppressive ligands. *Science* **251**, 283-287.
- Schrump, D. S., Chen, A. and Consoli, U.** (1996). Inhibition of lung cancer proliferation by antisense cyclin D. *Cancer Gene Ther.* **3**, 131-135.
- Sears, R., Ohtani, K. and Nevins, J. R.** (1997). Identification of positively and negatively acting elements regulating expression of the E2F2 gene in response to cell growth signals. *Mol. Cell Biol.* **17**, 5227-5235.
- Shaulian, E. and Karin, M.** (2001). AP-1 in cell proliferation and survival. *Oncogene* **20**, 2390-2400.
- Shaulian, E. and Karin, M.** (2002). AP-1 as a regulator of cell life and death. *Nat. Cell Biol.* **4**, E131-E136.
- Shaw, P. E.** (2002). Peptidyl-prolyl isomerases: a new twist to transcription. *EMBO Rep.* **3**, 521-526.
- Shen, M., Stukenberg, P. T., Kirschner, M. W. and Lu, K. P.** (1998). The essential mitotic peptidyl-prolyl isomerase Pin1 binds and regulates mitosis-specific phosphoproteins. *Genes Dev.* **12**, 706-720.
- Sinn, E., Muller, W., Pattengale, P., Tepler, I., Wallace, R. and Leder, P.** (1987). Coexpression of MMTV/v-Ha-ras and MMTV/c-myc genes in transgenic mice: synergistic action of oncogenes in vivo. *Cell* **49**, 465-475.
- Stukenberg, P. T. and Kirschner, M. W.** (2001). Pin1 acts catalytically to promote a conformational change in Cdc25. *Mol. Cell* **7**, 1071-1083.
- Sutherland, R. L. and Musgrove, E. A.** (2002). Cyclin D1 and mammary carcinoma: new insights from transgenic mouse models. *Breast Cancer Res.* **4**, 14-17.
- Taylor, W. R. and Stark, G. R.** (2001). Regulation of the G2/M transition by p53. *Oncogene* **20**, 1803-1815.
- Tetsu, O. and McCormick, F.** (1999). Beta-catenin regulates expression of cyclin D1 in colon carcinoma cells. *Nature* **398**, 422-426.
- Trimarchi, J. M. and Lees, J. A.** (2002). Sibling rivalry in the E2F family. *Nat. Rev. Mol. Cell Biol.* **3**, 11-20.
- Turenne, G. A., Paul, P., Laflair, L. and Price, B. D.** (2001). Activation of p53 transcriptional activity requires ATM's kinase domain and multiple N-terminal serine residues of p53. *Oncogene* **20**, 5100-5110.
- Verdecia, M. A., Bowman, M. E., Lu, K. P., Hunter, T. and Noel, J. P.** (2000). Structural basis for phosphoserine-proline recognition by group IV WW domains. *Nat. Struct. Biol.* **7**, 639-643.
- von Kries, J. P., Winbeck, G., Asbrand, C., Schwarz-Romond, T., Sochnikova, N., Dell'Oro, A., Behrens, J. and Birchmeier, W.** (2000). Hot spots in beta-catenin for interactions with LEF-1, conductin and APC. *Nat. Struct. Biol.* **7**, 800-807.
- Wahl, G. M. and Carr, A. M.** (2001). The evolution of diverse biological responses to DNA damage: insights from yeast and p53. *Nat. Cell Biol.* **3**, E277-E286.
- Wang, T. C., Cardiff, R. D., Zukerberg, L., Lees, E., Arnold, A. and**

- Schmidt, E. V. (1994). Mammary hyperplasia and carcinoma in MMTV-cyclin D1 transgenic mice. *Nature* **369**, 669-671.
- Weinberg, R. A. (1995). The molecular basis of oncogenes and tumor suppressor genes. *Ann. N. Y. Acad. Sci.* **758**, 331-338.
- Weiwad, M., Kullertz, G., Schutkowski, M. and Fischer, G. (2000). Evidence that the substrate backbone conformation is critical to phosphorylation by p42 MAP kinase. *FEBS Lett.* **478**, 39-42.
- Wells, N. J., Watanabe, N., Tokusumi, T., Jiang, W., Verdecia, M. A. and Hunter, T. (1999). The C-terminal domain of the Cdc2 inhibitory kinase Myt1 interacts with Cdc2 complexes and is required for inhibition of G(2)/M progression. *J. Cell Sci.* **112**, 3361-3371.
- Whitmarsh, A. J. and Davis, R. J. (1996). Transcription factor AP-1 regulation by mitogen-activated protein kinase signal transduction pathways. *J. Mol. Med.* **74**, 589-607.
- Winkler, K. E., Swenson, K. I., Kornbluth, S. and Means, A. R. (2000). Requirement of the prolyl isomerase Pin1 for the replication checkpoint. *Science* **287**, 1644-1647.
- Wu, X., Wilcox, C. B., Devasahayam, G., Hackett, R. L., Arevalo-Rodriguez, M., Cardenas, M. E., Heitman, J. and Hanes, S. D. (2000). The Ess1 prolyl isomerase is linked to chromatin remodeling complexes and the general transcription machinery. *EMBO J.* **19**, 3727-3738.
- Wulf, G. M., Ryo, A., Wulf, G. G., Lee, S. W., Niu, T. and Lu, K. P. (2001). Pin1 is overexpressed in breast cancer and potentiates the transcriptional activity of phosphorylated c-Jun towards the cyclin D1 gene. *EMBO J.* **20**, 3459-3472.
- Wulf, G. M., Liou, Y. C., Ryo, A., W., L. S. and Lu, K. P. (2002). Role of Pin1 in the regulation of p53 stability and p21 transactivation and cell cycle checkpoints in response to DNA damage. *J. Biol. Chem.* **277**, 47976-47979.
- Yaffe, M. B., Schutkowski, M., Shen, M., Zhou, X. Z., Stukenberg, P. T., Rahfeld, J., Xu, J., Kuang, J., Kirschner, M. W., Fischer, G. et al. (1997). Sequence-specific and phosphorylation-dependent proline isomerization: A potential mitotic regulatory mechanism. *Science* **278**, 1957-1960.
- Yao, J. L., Kops, O., Lu, P. J. and Lu, K. P. (2001). Functional conservation of phosphorylation-specific prolyl isomerases in plants. *J. Biol. Chem.* **276**, 13517-13523.
- Yu, Q., Geng, Y. and Sicinski, P. (2001). Specific protection against breast cancers by cyclin D1 ablation. *Nature* **411**, 1017-1021.
- Zacchi, P., Gostissa, M., Uchida, T., Salvagno, C., Avolio, A., Voliniak, S., Ronai, Z., Blandino, G., Schneider, C. and del Sal, G. (2002). The prolyl isomerase Pin1 reveals a mechanism to control p53 functions after genotoxic insults. *Nature* **419**, 853-857.
- Zhang, S. Y., Liu, S. C., Al-Saleem, L. F., Holloran, D., Babb, J., Guo, X. and Klein-Szanto, A. J. (2000). E2F-1: a proliferative marker of breast neoplasia. *Cancer Epidemiol. Biomarkers Prev.* **9**, 395-401.
- Zheng, H., You, H., Zhou, X. Z., Murray, S. A., Uchida, T., Wulf, G., Gu, L., Tang, X., Lu, K. P. and Xiao, Z. X. J. (2002). The prolyl isomerase Pin1 is a regulator of p53 in genotoxic response. *Nature* **419**, 849-853.
- Zhou, X. Z., Lu, P. J., Wulf, G. and Lu, K. P. (1999). Phosphorylation-dependent prolyl isomerization: A novel signaling regulatory mechanism. *Cell Mol. Life Sci.* **56**, 788-806.
- Zhou, X. Z., Kops, O., Werner, A., Lu, P. J., Shen, M., Stoller, G., Küllertz, G., Stark, M., Fischer, G. and Lu, K. P. (2000). Pin1-dependent prolyl isomerization regulates dephosphorylation of Cdc25C and tau proteins. *Mol. Cell* **6**, 873-883.
- Zhou, Z. Q. and Hurlin, P. J. (2001). The interplay between Mad and Myc in proliferation and differentiation. *Trends Cell Biol.* **11**, S10-S14.
